# Supplementary material for: Examining the impact of ICU population interaction structure on modeled colonization dynamics of Staphylococcus aureus
Source: PLoS Comput Biol. 2022 Jul 25;18(7):e1010352. doi: 10.1371/journal.pcbi.1010352 (PMC9352208; doi:10.1371/journal.pcbi.1010352)
Supplement: S1 Table — (DOCX) [file pcbi.1010352.s001.docx]

**Population Structure Drives Differential Methicillin-resistant *Staphylococcus aureus* Colonization Dynamics**

**Supplemental Material**

**Table S1** Transitions and Equations for the Single Staff Type (SST) Model of MRSA Acquisition

| Process | Event | Transition | Equation |
| --- | --- | --- | --- |
| MRSA Acquisition & Transmission | Staff Contaminated | SU to SC |  |
| Patient Colonized | PU to PC |  |
| MRSA Decolonization | Natural De-colonization | PC to PU | μ |
| Hand Hygiene and Decontamination | Hand Decontamination | SC to SU |  |
| PPE Change | SC to SU |  |
| Patient Admissions and Discharge | PU Discharge to PU Admission* |  |  |
| PU Discharge to PC Admission* |  |  |
| PC Discharge to PU Admission* |  |  |
| PC Discharge to PC Admission* |  |  |

* Note that patient discharge to patient admissions are not true “transitions” of a single individual, but rather the instantaneous replacement of a discharged patient with a newly admitted patient to maintain a steady population state. See 37 for details.
